# Supplementary material for: Functional validation of GWAS gene candidates for abnormal liver function during zebrafish liver development
Source: PubMed Central journal article supplement (PMC3759346; doi:10.1242/dmm.011726), 2013-06-27
Supplement: supp_011726_DMM011726.pdf [file supp_011726_DMM011726.pdf]

**Table S1:** PCR primers for sequencing of ATG-site morpholino target region

| <b>Gene</b>    | <b>Target Sequence</b>                                                                                                          |
|----------------|---------------------------------------------------------------------------------------------------------------------------------|
| <i>pnpla3</i>  | 5' CCGCAGCTGTATCCCTTCTA 3',<br>5' GCATTACCTATGCAAGCCTCT 3'                                                                      |
| <i>cpn1</i>    | 5' CAGCAATCATGCCTCAAAAA 3',<br>5' GCCCTCACCATCTCCTCATA 3'                                                                       |
| <i>trib1</i>   | 5' TTGCGTGAAATCAGACGGTA 3',<br>5' ACTCTCAGCCAGGAAGGACA 3'                                                                       |
| <i>fads2</i>   | 5' TTTGCTTTTGTGACCCAGTG 3',<br>5' GCACCAAGCCAATGTTTCTA 3'                                                                       |
| <i>mif</i>     | 5' GCGGGGTTTACGGTAGTCT 3',<br>5' GTGCTTACAGTTTCTATCCCATCT 3'                                                                    |
| <i>slc2a2</i>  | 5' AAGGTCTGATCCCAGCACAC 3',<br>5' CTCCGGTCAATTTTGCAGTT 3'                                                                       |
| <i>pklr</i>    | 5' AGCTTCAGGGAAGATGAGCA 3',<br>5' TTTGGGAGAGGGATGATTTG 3' and<br>5' TGCCTGAAGTCTTTTCTCTTATTTT 3',<br>5' TCCAGCAGACACAGATGCTC 3' |
| <i>mapk10</i>  | 5' TGCCTTGTTGAGCGTAGTTG 3',<br>5' CTAAGGAGGGGTTTGGGAAC 3' and<br>5' CCTTCACGAACACCATCAGA 3',<br>5' CTCACAGAATGGAAGTGAATGAA 3'   |
| <i>aldob</i>   | 5' ATCGTTCAGTCCCGATTAC 3',<br>5' CACTTGCATGTTACGGTTC 3'                                                                         |
| <i>efna1a</i>  | 5' CGCGGATCTCTTGATTAGT 3',<br>5' CGAACACAGCGCAGATACTC 3'                                                                        |
| <i>efna1b</i>  | 5' GCATTTAACCGCGTCTGTTT 3',<br>5' CGCACACAGCTTGCATTAAG 3'                                                                       |
| <i>samm50</i>  | 5' CAACGTGACGTGGTTGTTCT 3',<br>5' GTTTCTGAACTCGGCCTGTC 3'                                                                       |
| <i>mical3a</i> | 5' TCATTCAGGGTGAAAATGTCC 3',<br>5' AAGCCTTGAGAGTGCCTTTG 3'                                                                      |
| <i>mical3b</i> | 5' ATTGTCTGCTCCCCATTCAG 3',<br>5' TTTCTGGCAGGCTCTTTTGT 3'                                                                       |

**Table S2:** Effect of gene knockdown using splice site morpholinos on hepatic progenitor population (*hhex* expression).

| <b>Morpholino</b> | <b>% small</b> | <b>% normal</b> | <b>% large</b> | <b>n</b> | <b>Significance</b> |
|-------------------|----------------|-----------------|----------------|----------|---------------------|
| control           | 21.2%          | 73.7%           | 5.1%           | 99       |                     |
| <i>pnpla3</i>     | 43.8%          | 56.3%           | 0.0%           | 112      | p < 0.05            |
| control           | 18.1%          | 71.4%           | 10.5%          | 105      |                     |
| <i>cpn1</i>       | 19.0%          | 71.4%           | 9.5%           | 84       | n.s.                |
| control           | 14.3%          | 80.0%           | 5.7%           | 35       |                     |
| <i>trib</i>       | 25.0%          | 65.0%           | 10.0%          | 40       | n.s.                |
| control           | 10.2%          | 81.6%           | 8.2%           | 49       |                     |
| <i>fads2</i>      | 16.0%          | 76.0%           | 8.0%           | 50       | n.s.                |
| control           | 21.2%          | 61.5%           | 17.3%          | 52       |                     |
| <i>mif</i>        | 24.1%          | 70.4%           | 5.6%           | 54       | n.s.                |
| control           | 16.7%          | 72.9%           | 10.4%          | 48       |                     |
| <i>slc2a3</i>     | 15.1%          | 77.4%           | 7.5%           | 53       | n.s.                |
| control           | 24.6%          | 69.2%           | 6.2%           | 65       |                     |
| <i>pklr</i>       | 43.4%          | 55.8%           | 0.9%           | 113      | p < 0.05            |
| control           | 12.3%          | 80.7%           | 7.0%           | 57       |                     |
| <i>mapk10</i>     | 34.7%          | 61.3%           | 4.0%           | 75       | p < 0.05            |
| control           | 19.2%          | 73.1%           | 7.7%           | 78       |                     |
| <i>aldob</i>      | 29.5%          | 65.3%           | 5.3%           | 95       | n.s.                |
| control           | 38.1%          | 61.9%           | 0.0%           | 21       |                     |
| <i>efna1a</i>     | 48.1%          | 51.9%           | 0.0%           | 27       | n.s.                |
| control           | 23.9%          | 71.7%           | 4.3%           | 46       |                     |
| <i>efna1b</i>     | 32.1%          | 66.1%           | 1.8%           | 56       | n.s.                |
| control           | 15.2%          | 74.2%           | 10.6%          | 66       |                     |
| <i>samm50</i>     | 15.9%          | 76.2%           | 7.9%           | 63       | n.s.                |
| control           | 18.5%          | 79.6%           | 1.9%           | 54       |                     |
| <i>mical3a</i>    | 22.4%          | 74.1%           | 0.0%           | 58       | n.s.                |
| control           | 25.0%          | 67.6%           | 7.4%           | 68       |                     |
| <i>mical3b</i>    | 25.3%          | 65.9%           | 8.8%           | 91       | n.s.                |

**Table S3:** Effect of gene knockdown using splice-site morpholinos on hepatocyte gene expression and liver size (*fabp10a* expression).

| <b>Morpholino</b> | <b>% small</b> | <b>% normal</b> | <b>% large</b> | <b>n</b> | <b>Significance</b> |
|-------------------|----------------|-----------------|----------------|----------|---------------------|
| control           | 23.5%          | 70.6%           | 5.9%           | 34       |                     |
| <i>pnpla3</i>     | 71.1%          | 26.3%           | 2.6%           | 38       | p < 0.05            |
| control           | 35.6%          | 53.3%           | 11.1%          | 45       |                     |
| <i>cpn1</i>       | 78.7%          | 21.3%           | 0.0%           | 47       | p < 0.05            |
| control           | 36.4%          | 63.6%           | 0%             | 44       |                     |
| <i>trib</i>       | 69.8%          | 30.2%           | 0%             | 53       | p < 0.05            |
| control           | 18.2%          | 74.0%           | 7.8%           | 77       |                     |
| <i>fads2</i>      | 43.7%          | 53.5%           | 2.8%           | 71       | p < 0.05            |
| control           | 40.4%          | 51.1%           | 8.5%           | 47       |                     |
| <i>mif</i>        | 31.0%          | 59.5%           | 9.5%           | 42       | n.s.                |
| control           | 23.0%          | 67.0%           | 10.0%          | 100      |                     |
| <i>slc2a3</i>     | 54.7%          | 35.9%           | 9.4%           | 117      | p < 0.05            |
| control           | 26.2%          | 59.0%           | 14.8%          | 61       |                     |
| <i>pklr</i>       | 67.2%          | 29.5%           | 3.3%           | 61       | p < 0.05            |
| control           | 26.9%          | 73.1%           | 0.0%           | 26       |                     |
| <i>mapk10</i>     | 87.5%          | 12.5%           | 0.0%           | 48       | p < 0.05            |
| control           | 18.0%          | 72.1%           | 9.8%           | 61       |                     |
| <i>aldob</i>      | 26.3%          | 63.2%           | 10.5%          | 57       | n.s.                |
| control           | 20.0%          | 75.0%           | 5.0%           | 40       |                     |
| <i>efna1a</i>     | 26.8%          | 68.3%           | 4.9%           | 41       | n.s.                |
| control           | 30.4%          | 60.7%           | 8.9%           | 56       |                     |
| <i>efna1b</i>     | 32.0%          | 60.0%           | 8.0%           | 50       | n.s.                |
| control           | 8.6%           | 80.0%           | 11.4%          | 35       |                     |
| <i>samm50</i>     | 65.4%          | 34.6%           | 0.0%           | 26       | p < 0.05            |
| control           | 40.9%          | 54.5%           | 4.5%           | 44       |                     |
| <i>mical3a</i>    | 42.9%          | 50.0%           | 7.1%           | 42       | n.s.                |
| control           | 24.4%          | 63.3%           | 12.2%          | 90       |                     |
| <i>mical3b</i>    | 32.6%          | 61.1%           | 6.3%           | 95       | n.s.                |

**Table S4:** Susceptibility to metabolic and toxic injury after gene knockdown using splice-site morpholinos

| <b>Gene knockdown</b> | <b>+2% EtOH (Oil Red O)</b> | <b>+2.5 mM APAP (<i>fabp10a</i> expression)</b> |
|-----------------------|-----------------------------|-------------------------------------------------|
| <i>pnpla3</i>         | unchanged                   | <b>reduced</b>                                  |
| <i>cpn1</i>           | unchanged                   | unchanged                                       |
| <i>trib1</i>          | unchanged                   | <b>reduced</b>                                  |
| <i>fads2</i>          | unchanged                   | unchanged                                       |
| <i>mif</i>            | unchanged                   | unchanged                                       |
| <i>slc2a2</i>         | unchanged                   | unchanged                                       |
| <i>pklr</i>           | unchanged                   | unchanged                                       |
| <i>mapk10</i>         | unchanged                   | unchanged                                       |
| <i>aldob</i>          | unchanged                   | unchanged                                       |
| <i>efna1a</i>         | unchanged                   | unchanged                                       |
| <i>efna1b</i>         | unchanged                   | unchanged                                       |
| <i>samm50</i>         | unchanged                   | Trend toward <b>reduced</b>                     |
| <i>mical3a</i>        | unchanged                   | unchanged                                       |
| <i>mical3b</i>        | unchanged                   | unchanged                                       |
